# Supplementary material for: Solventless mechanochemical metallation of porphyrins
Source: Royal Society of Chemistry journal article supplement (doi:10.1039/c6gc02420c), 2016-11-22
Supplement: c6gc02420c1.pdf [file c6gc02420c1.pdf]

## Electronic Supplementary Information

### Solventless mechanochemical metallation of porphyrins

Kathryn Ralphs, Chen Zhang and Stuart L. James

School of Chemistry and Chemical Engineering, Queens University Belfast, David Keir Building, Stranmillis Road, Belfast, N. Ireland, BT9 5AG

#### 1. Experimental

##### Equipment used

Retsch Mixer mill (MM400) with a 25 ml stainless steel jar equipped with a 15 mm stainless steel ball. Bruker Avance 300 MHz NMR spectrometer. Perkin Elmer Lambda 25 UV-Vis spectrometer. Perkin Elmer Spectrum One FT-IR spectrometer

##### Materials

Materials were obtained from Sigma Aldrich and used as received.

##### Metallation of the porphyrin

In a typical experiment, a 25 ml stainless steel jar was charged with 25.3 mg or 151.5 mg of *meso*-tetraphenylporphyrin and the required amount of metal acetate salt (see Tables S1 and S2) and milled for 20-90 min at 25-30 Hz in a shaker mill.

**Table S1 Quantities of materials used to prepare metallated porphyrins (small scale)**

| Complex            | Metal salt                              | Purity of metal salt (%) | Moles                 | Quantity (mg) |
|--------------------|-----------------------------------------|--------------------------|-----------------------|---------------|
| H <sub>2</sub> TPP | /                                       | 99                       | 4.07x10 <sup>-5</sup> | 25.3          |
| ZnTPP              | Zn(OAc) <sub>2</sub> .2H <sub>2</sub> O | 99.99                    | 4.07x10 <sup>-5</sup> | 8.9           |
| NiTPP              | Ni(OAc) <sub>2</sub> .4H <sub>2</sub> O | 98                       | 4.07x10 <sup>-5</sup> | 10            |
| CuTPP              | Cu(OAc) <sub>2</sub> .H <sub>2</sub> O  | 99.99                    | 4.07x10 <sup>-5</sup> | 7.4           |
| FeTPP              | Fe(OAc) <sub>2</sub>                    | 99.99                    | 4.07x10 <sup>-5</sup> | 7.1           |

**Table S2 Quantities of materials used to prepare metallated porphyrins (large scale)**

| Complex            | Metal salt                              | Purity of metal salt (%) | Moles                 | Quantity (mg) |
|--------------------|-----------------------------------------|--------------------------|-----------------------|---------------|
| H <sub>2</sub> TPP | /                                       | 99                       | 2.44x10 <sup>-4</sup> | 151.5         |
| ZnTPP              | Zn(OAc) <sub>2</sub> .2H <sub>2</sub> O | 99.99                    | 2.44x10 <sup>-4</sup> | 54            |
| NiTPP              | Ni(OAc) <sub>2</sub> .4H <sub>2</sub> O | 98                       | 2.44x10 <sup>-4</sup> | 62            |
| CuTPP              | Cu(OAc) <sub>2</sub> .H <sub>2</sub> O  | 99.99                    | 2.44x10 <sup>-4</sup> | 44            |

## 2. Analytical data for the metallated porphyrins

**Table S3** UV visible data for porphyrins (dichloromethane solution)

| <b>Porphyrin</b>  | <b>Soret Bands</b> | <b>Q bands</b>     |
|-------------------|--------------------|--------------------|
| TPPH <sub>2</sub> | 418                | 516, 550, 590, 645 |
| ZnTPP             | 418                | 547, 584           |
| NiTPP             | 417                | 526                |
| CuTPP             | 416                | 540, 620           |
| FeTPP             | 417                | 509, 580           |

**Table S4** IR data for porphyrins (KBr disc)

| <b>Porphyrin</b>  | <b>IR Spectroscopic Data</b> |
|-------------------|------------------------------|
| TPPH <sub>2</sub> | 3317, 1594, 983, 800         |
| ZnTPP             | 1599, 1002, 797              |
| NiTPP             | 1599, 1007, 797              |
| CuTPP             | 1603, 1006, 801              |
| FeTPP             | 1599, 1007, 802              |

**Table S5** Mass spectrometric data for porphyrins

| <b>Porphyrin</b> | <b>Ion observed<br/>(M+ calc.)</b> |
|------------------|------------------------------------|
| ZnTPP            | 677.17 (678.11)                    |
| NiTPP            | 671.18 (671.41)                    |
| CuTPP            | 676.16 (676.26)                    |
| FeTPP            | 669.17 (668.56)                    |

**Table S6** <sup>1</sup>H NMR data for porphyrins (CDCl<sub>3</sub>)

| <b>Porphyrin</b>  | <b>Chemical shift / ppm</b> |              |             |             |            |
|-------------------|-----------------------------|--------------|-------------|-------------|------------|
|                   | <b>Proton</b>               |              |             |             |            |
|                   | <b>Pyrrole</b>              | <b>Ortho</b> | <b>Meta</b> | <b>Para</b> | <b>N-H</b> |
| TPPH <sub>2</sub> | 8.85                        | 8.23         | 7.77        | 7.77        | -2.79      |
| ZnTPP             | 8.74                        | 8.02         | 7.69        | 7.69        | -          |
| NiTPP             | 8.74                        | 8.02         | 7.69        | 7.69        | -          |

### 3. Spectra

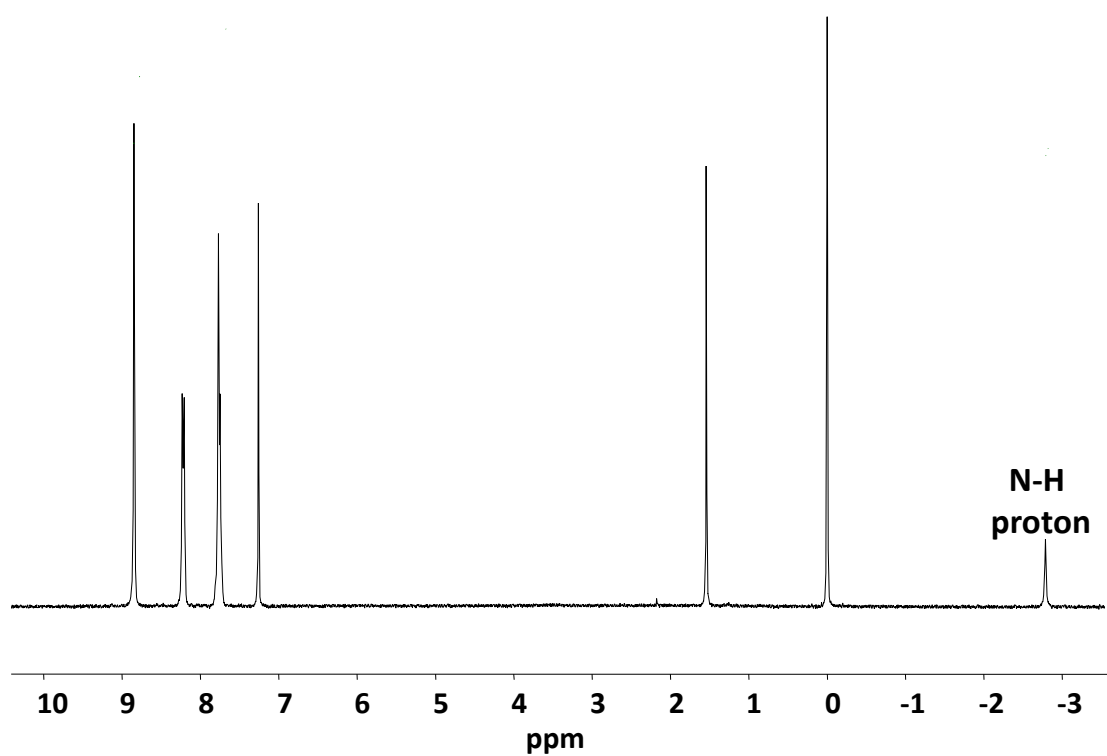

Figure S1  $^1\text{H-NMR}$  spectrum of  $\text{H}_2\text{TPP}$

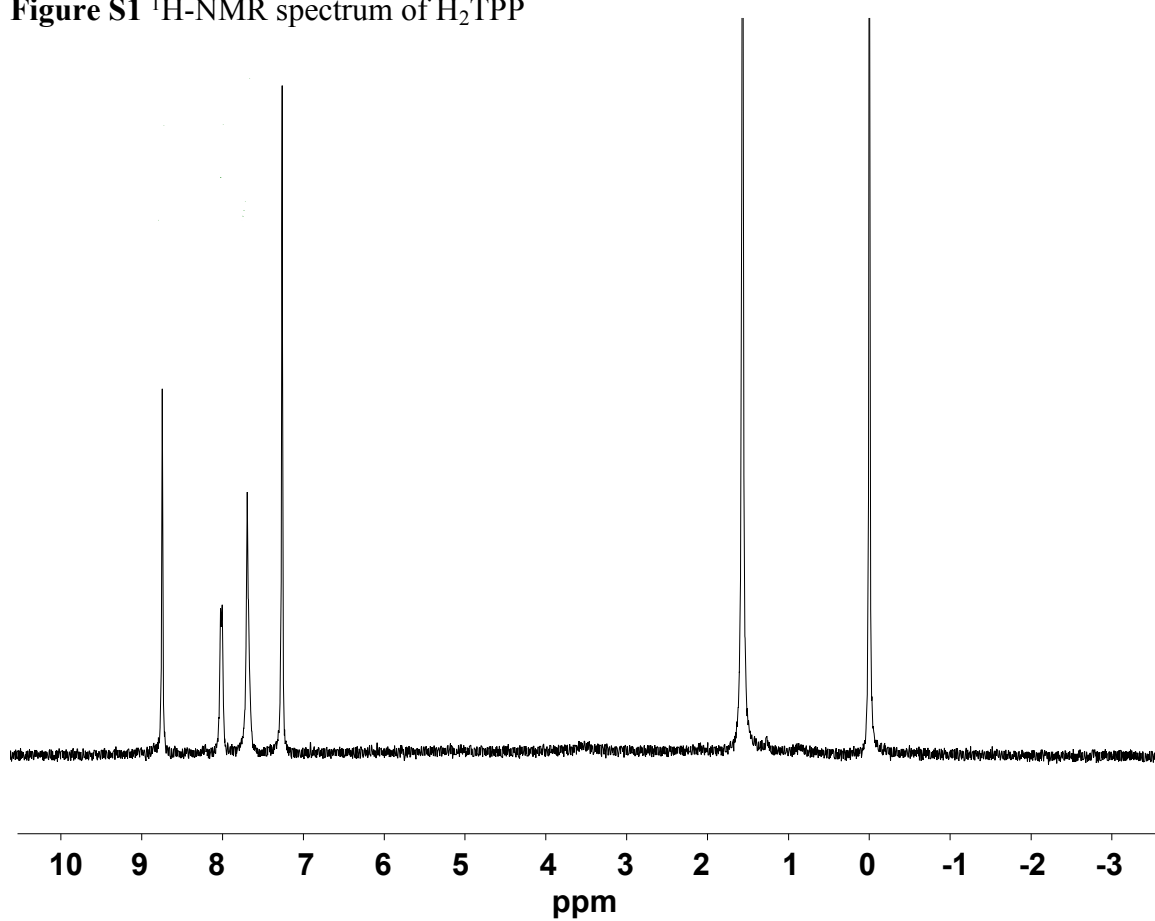

Figure S2  $^1\text{H-NMR}$  spectrum of  $\text{ZnTPP}$

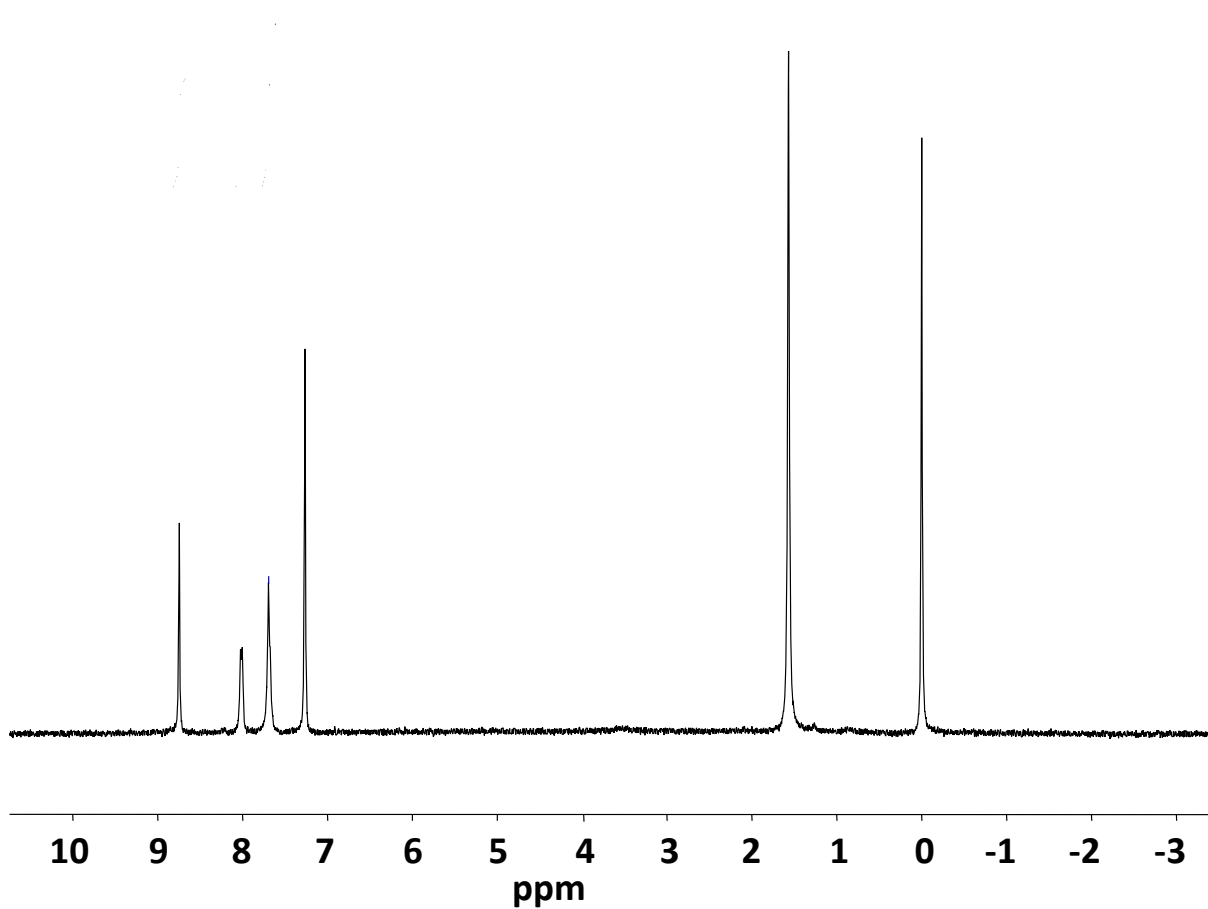

**Figure S3**  $^1\text{H-NMR}$  spectrum of NiTPP

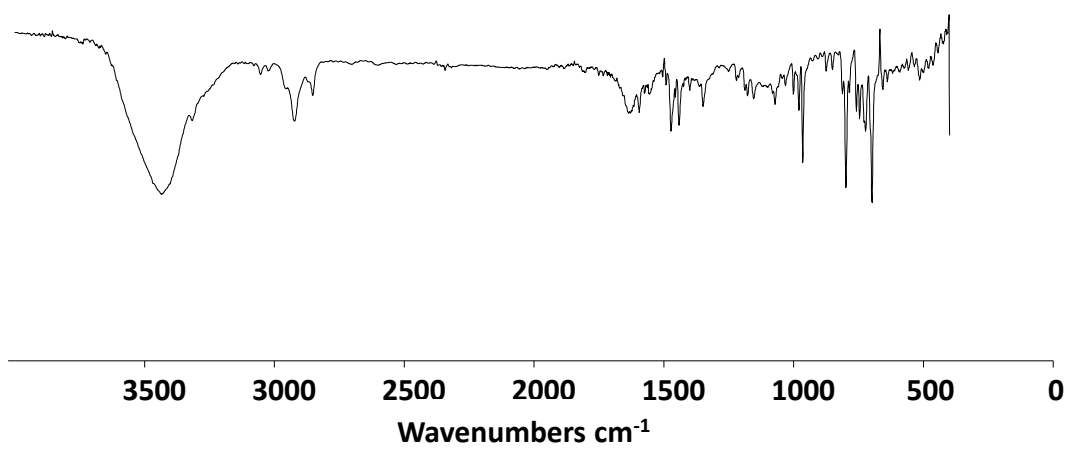

**Figure S4** FT-IR spectrum of  $\text{H}_2\text{TPP}$

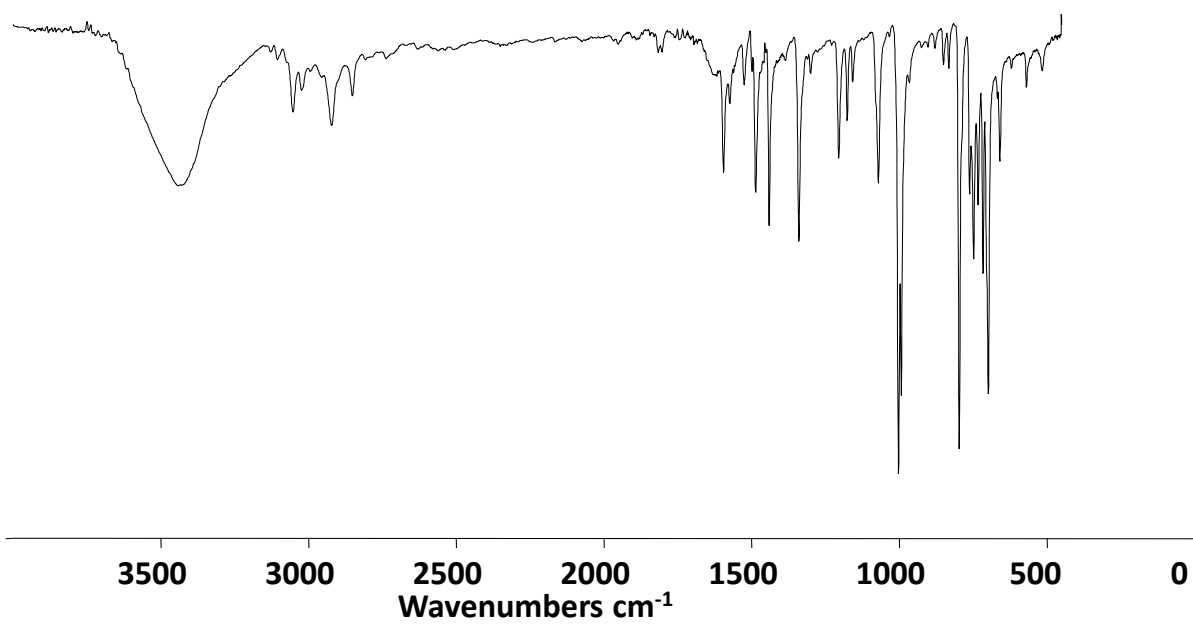

**Figure S5** FT-IR spectrum of ZnTPP

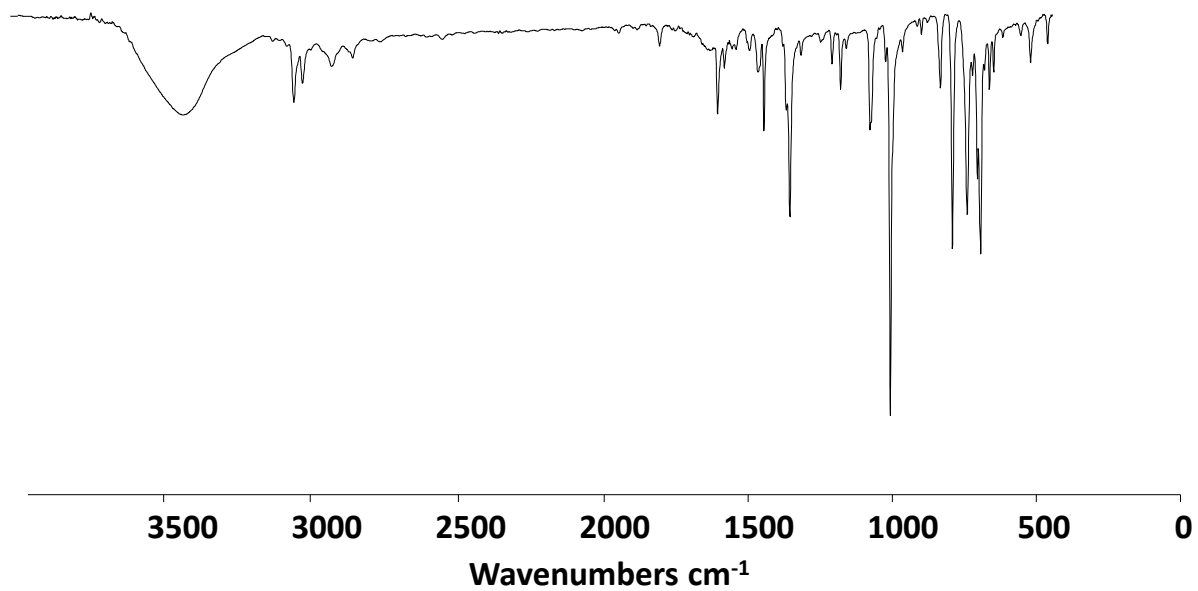

**Figure S6** FT-IR spectrum of NiTPP

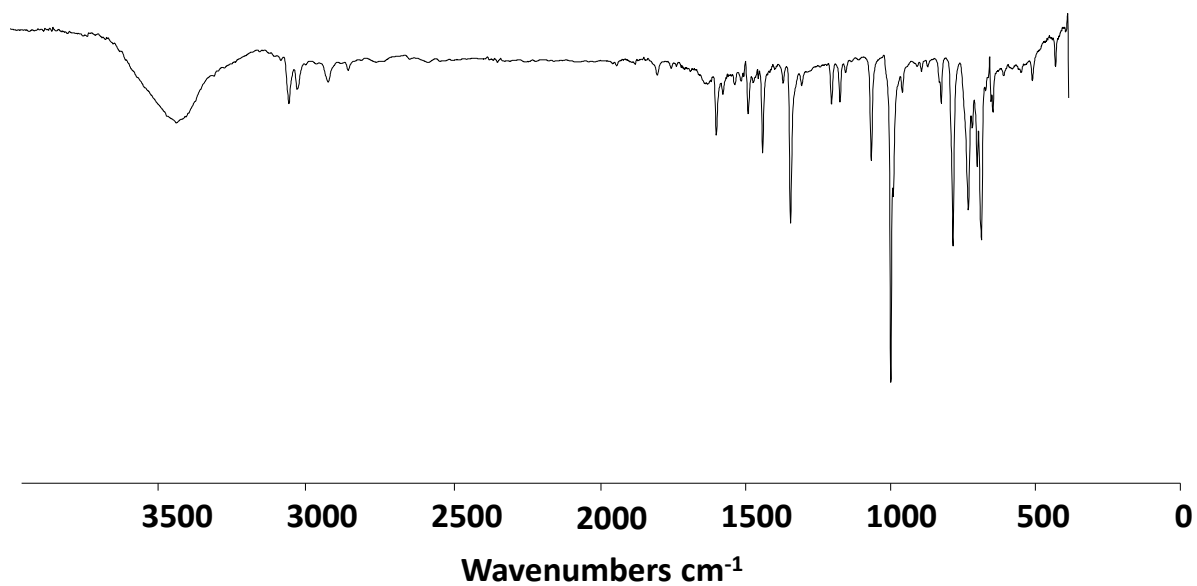

**Figure S7** FT-IR spectrum of CuTPP

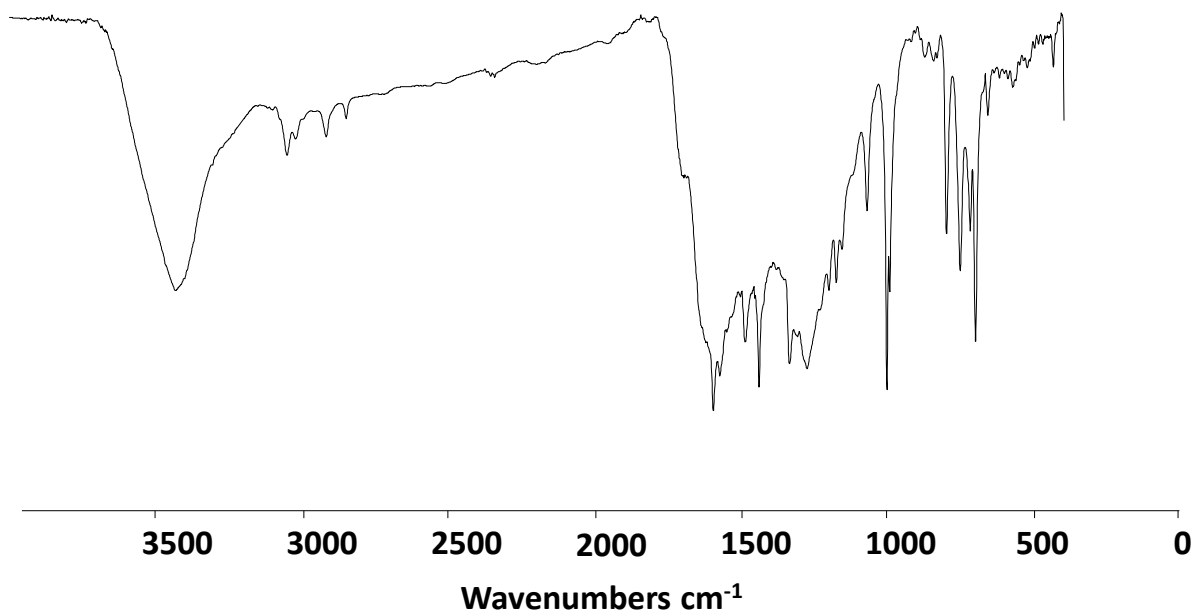

**Figure S8** FT-IR spectrum of FeTPP

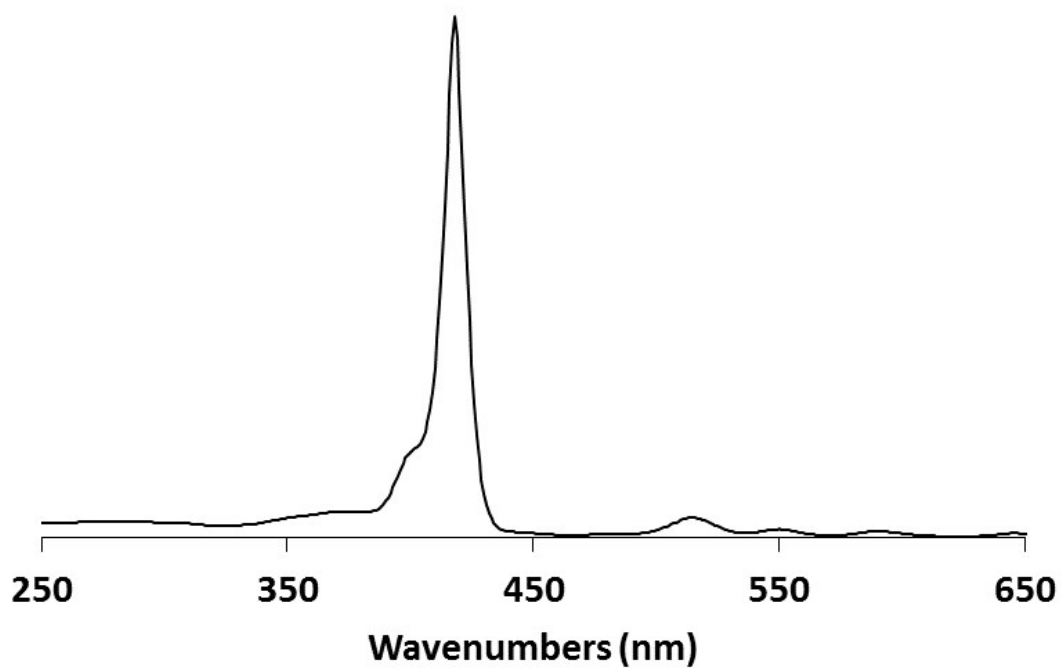

**Figure S9** Absorption spectrum of TPPH<sub>2</sub> showing the Soret and Q bands.

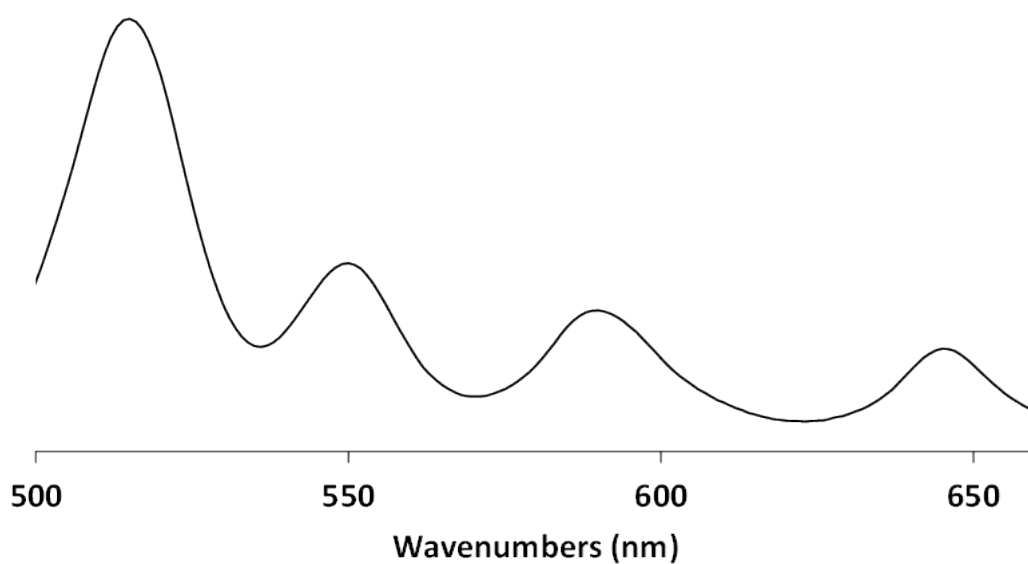

**Figure S10** Absorption spectrum of TPPH<sub>2</sub> showing the Q bands.



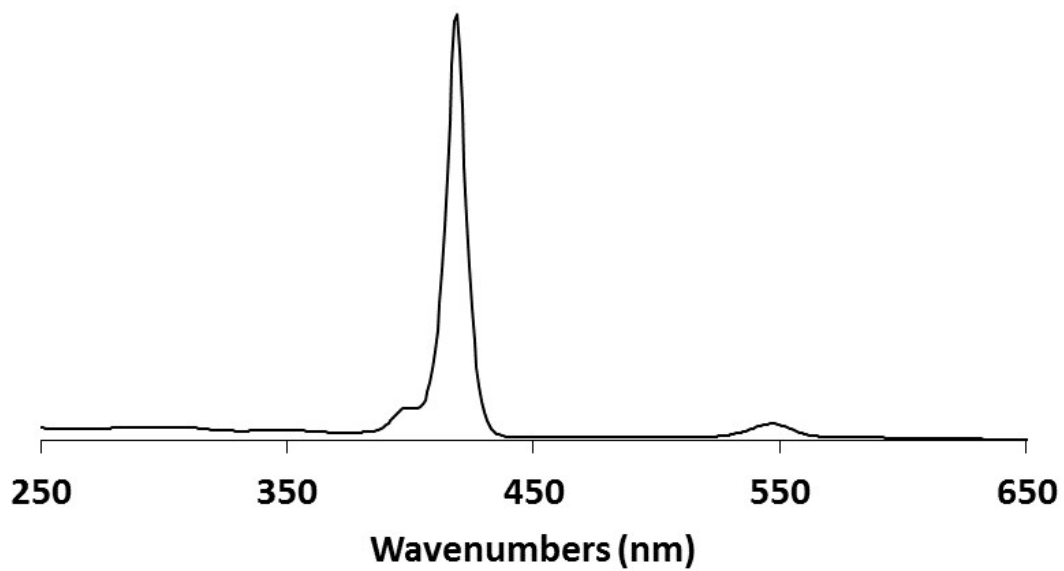

**Figure S11** Absorption spectrum of ZnTPP showing the Soret and Q bands.

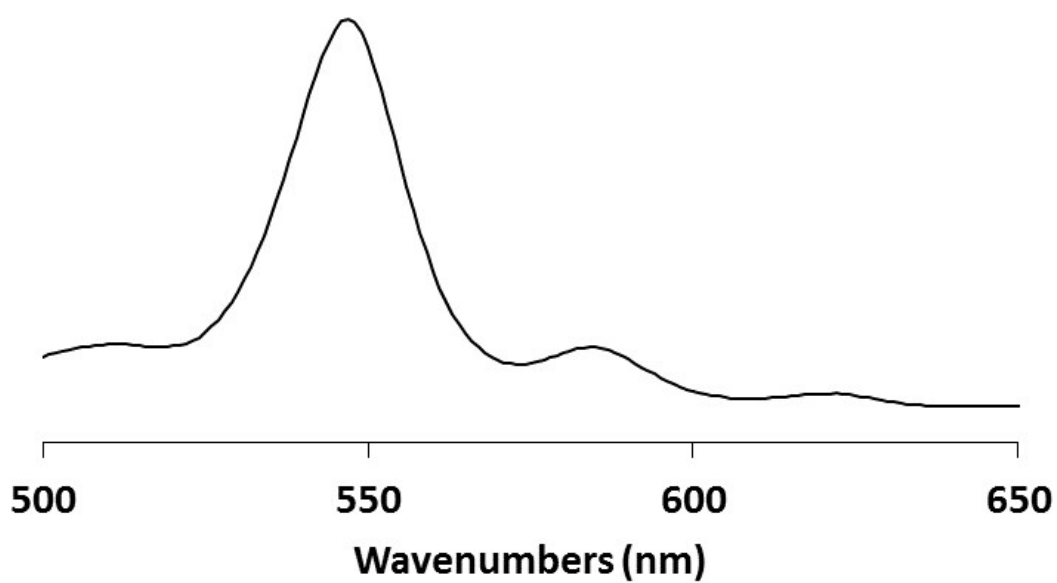

**Figure S12** Absorption spectrum of ZnTPP showing the Q bands.

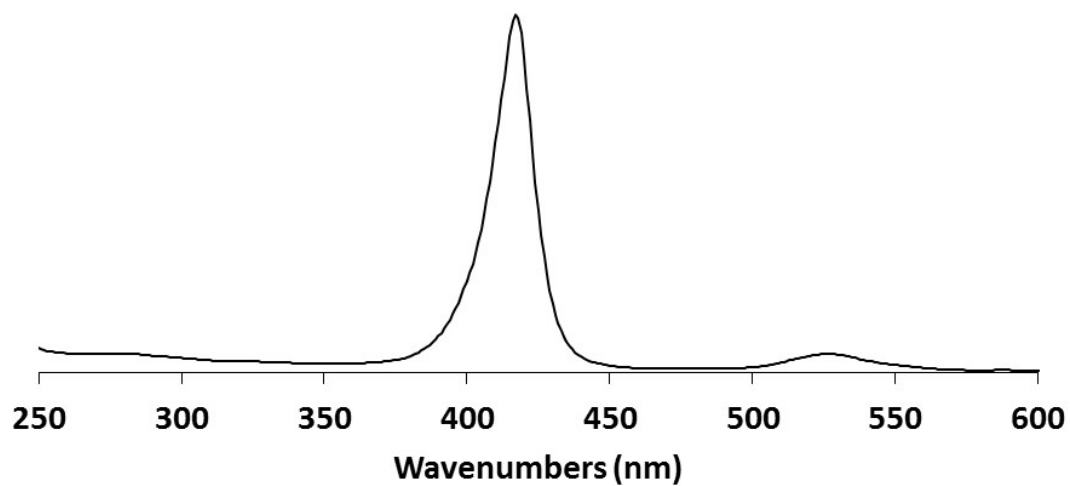

**Figure S13** Absorption spectrum of NiTPP showing the Soret and Q bands

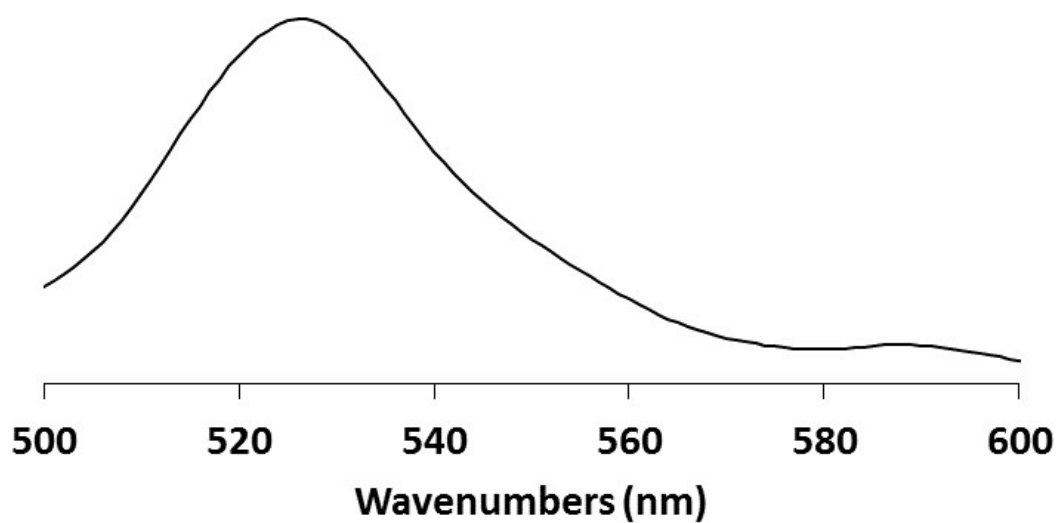

**Figure S14** Absorption spectrum of NiTPP showing the Q bands

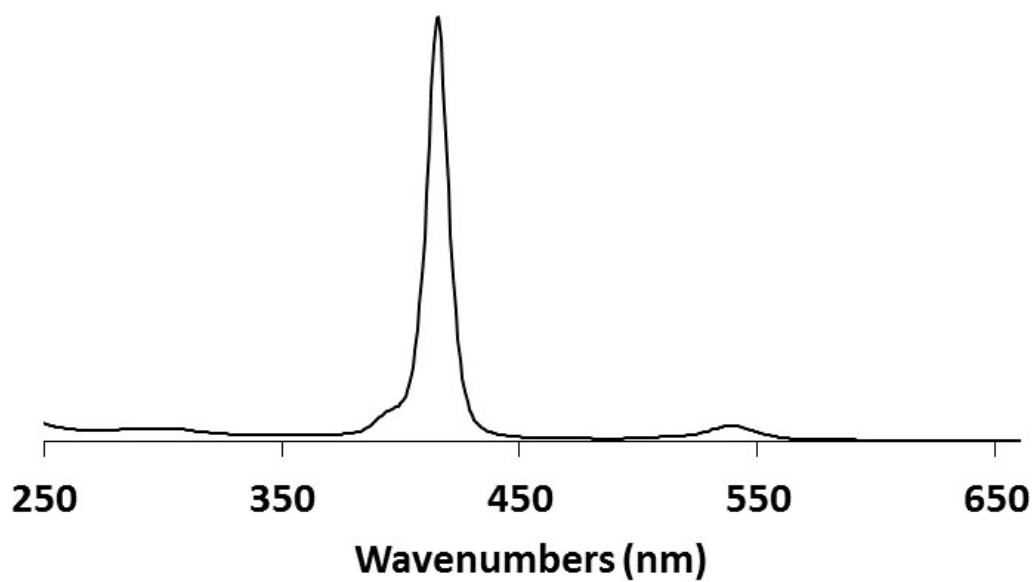

**Figure S15** Absorption spectrum of CuTPP showing the Soret and Q bands

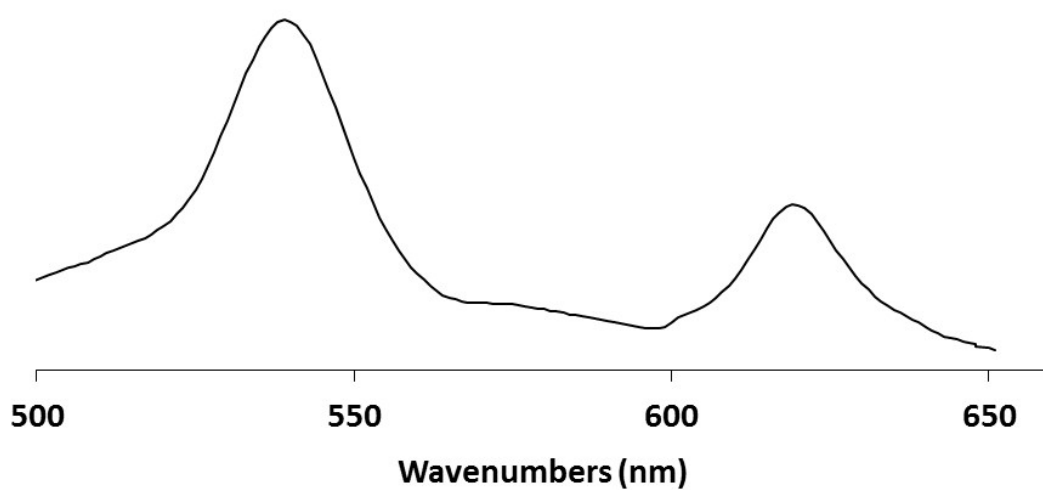

**Figure S16** Absorption spectrum of CuTPP showing the Q bands

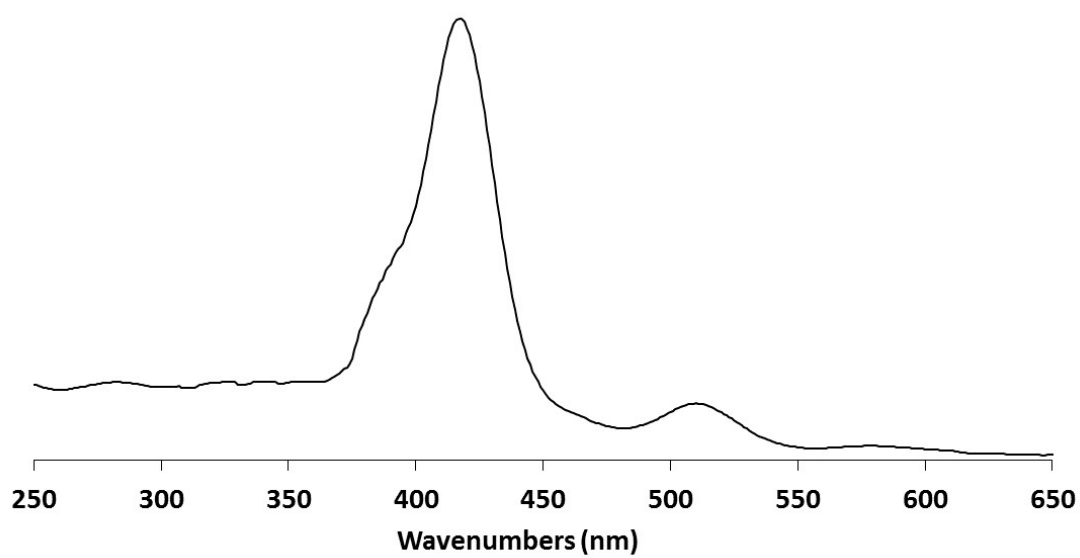

**Figure S17** Absorption spectrum of FeTPP showing the Soret and Q bands

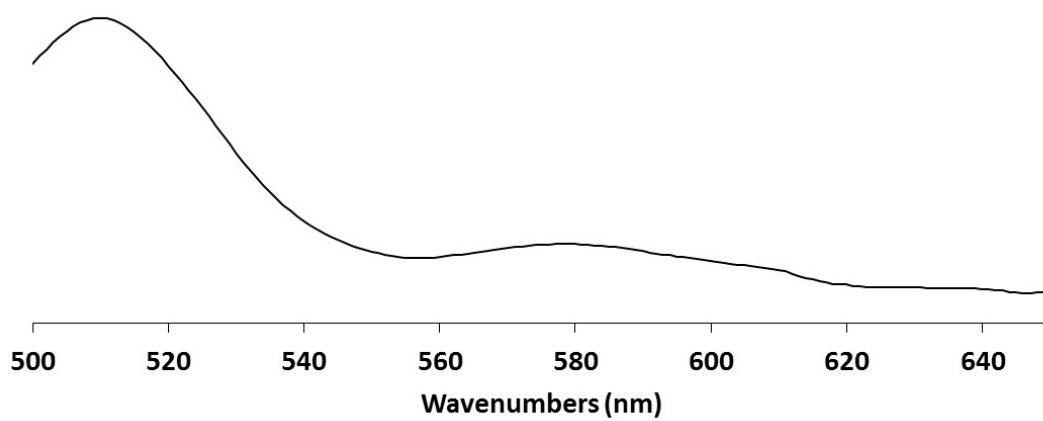

**Figure S18** Absorption spectrum of FeTPP showing the Q bands

**Table S7 Summary of unsuccessful attempted metalation reactions with Au, Mg, Ag, Pt, Li, Mn and Co**

| Metal     | Metal salt                              | Speed (Hz) | Time (Min) | Additives (cm <sup>3</sup> ) | Successful (Y/N) |
|-----------|-----------------------------------------|------------|------------|------------------------------|------------------|
| Gold      | Au(OAc) <sub>3</sub>                    | 25         | 20         | /                            | N                |
|           |                                         | 25         | 60         | /                            | N                |
|           |                                         | 25         | 60         | Py (0.2)                     | N                |
|           |                                         | 30         | 90         |                              | N                |
|           |                                         | 30         | 90         | DMF (0.4)                    | N                |
| Magnesium | Mg(OAc) <sub>2</sub> ·4H <sub>2</sub> O | 25         | 40         | /                            | N                |
|           |                                         | 25         | 40         | DMF (0.2)                    | N                |
|           |                                         | 25         | 60         | /                            | N                |
|           |                                         | 25         | 80         | /                            | N                |
|           |                                         | 25         | 100        | /                            | N                |
|           |                                         | 25         | 100        | DMF (0.2)                    | N                |
|           |                                         | 25         | 270        | /                            | N                |
|           |                                         | 30         | 30         | /                            | N                |
|           |                                         | 30         | 30         | DMF (0.2)                    | N                |
|           |                                         | 30         | 30         | DMF (0.4)                    | N                |
|           |                                         | 30         | 40         | /                            | N                |
|           |                                         | 30         | 40         | /                            | N                |
|           |                                         | 30         | 120        | DMF (0.2)                    | N                |
|           |                                         | 30         | 180        | /                            | N                |
|           |                                         | 30         | 180        | DMF (0.2)                    | N                |
| Silver    | Ag(OAc)                                 | 25         | 20         | /                            | N                |
|           |                                         | 25         | 60         | /                            | N                |
|           |                                         | 30         | 30         | /                            | N                |
|           |                                         | 30         | 45         | /                            | N                |
|           |                                         | 30         | 120        | /                            | N                |
|           |                                         | 30         | 30         | MeOH (0.6)                   | N                |
|           |                                         | 30         | 30         | Py (0.4)                     | N                |
|           |                                         | 30         | 30         | H <sub>2</sub> O (0.4)       | N                |
|           |                                         | 30         | 30         | MeOH (0.4)                   | N                |
|           |                                         | 30         | 45         | MeOH (0.4)                   | N                |
|           |                                         | 30         | 60         | /                            | N                |
|           |                                         | 30         | 60         | MeOH (0.4)                   | N                |
|           |                                         | 30         | 90         | MeOH (0.4)                   | N                |
|           |                                         | 30         | 120        | MeOH (0.4)                   | N                |
|           |                                         | 30         | 180        | MeOH (0.4)                   | N                |

|           |                                         |    |    |   |   |
|-----------|-----------------------------------------|----|----|---|---|
| Platinum  | PtO <sub>2</sub>                        | 25 | 40 | / | N |
|           | H <sub>2</sub> Pt(OH) <sub>6</sub>      | 25 | 40 | / | N |
| Lithium   | Li(OAc)                                 | 25 | 20 | / | N |
|           |                                         | 25 | 40 | / | N |
| Manganese | Mn(OAc) <sub>2</sub> ·4H <sub>2</sub> O | 25 | 20 | / | N |
|           |                                         | 25 | 40 | / | N |
| Cobalt    | Co(OAc) <sub>2</sub>                    | 25 | 20 | / | N |
|           |                                         | 25 | 60 | / | N |
